# Supplementary material
Source: MDPI journal article supplement (https://www.mdpi.com/2410-3888/8/7/371)
Supplement: s1 [file s1]

**Table S1.** Contribution (%) of the principal fish species or ethno-species landed at the fishing ports monitored on the lower Amazon between 1993 and 2011.

| English name           | Local names                           | Scientific name                                                                         | %     |
|------------------------|---------------------------------------|-----------------------------------------------------------------------------------------|-------|
| Long-whiskered catfish | Mapará                                | <i>Hypophthalmus edentatus</i> ,<br><i>Hypophthalmus fimbriatus</i>                     | 18.8% |
| Driftwood catfish      | Mandubé                               | <i>Ageneiosus</i> spp.                                                                  | 15.7% |
| Gilded catfish         | Dourada                               | <i>Brachyplatystoma rousseauxii</i>                                                     | 10.1% |
| Curimatã               | Curimatã                              | <i>Prochilodus nigricans</i>                                                            | 8.1%  |
| Janitor fish           | Acari-bodó                            | <i>Pterygoplichthys pardalis</i>                                                        | 4.4%  |
| Surubim                | Surubim-lenha, canela, pintado, tigre | <i>Pseudoplatystoma fasciatum</i> ,<br><i>Pseudoplatystoma tigrinum</i>                 | 3.9%  |
| Catfish                | Fura calça                            | <i>Pimelodina flavipinnis</i>                                                           | 3.7%  |
| Piraíba                | Filhote                               | <i>Brachyplatystoma filamentosum</i>                                                    | 3.6%  |
| Jaraqui                | Jaraqui escama fina, escama grossa    | <i>Semaprochilodus taeniurus</i> ,<br><i>Semaprochilodus insignis</i>                   | 3.6%  |
| Croaker                | Pescada branca, pescada preta         | <i>Plagioscion squamosissimus</i> ,<br><i>Plagioscion auratus</i>                       | 3.5%  |
| Headstander            | Aracu comum, amarelo, cabeça gorda    | <i>Schizodon fasciatus</i> ,<br><i>Leporinus fasciatus</i> , <i>Leporinus friderici</i> | 3.5%  |
| Goliath catfish        | Piramutaba                            | <i>Brachyplatystoma vaillantii</i>                                                      | 2.8%  |
| Tambaqui               | Tambaqui amarelo, preto               | <i>Colossoma macropomum</i>                                                             | 2.7%  |

| English name         | Local names                                          | Scientific name                                                                                                                                 | %    |
|----------------------|------------------------------------------------------|-------------------------------------------------------------------------------------------------------------------------------------------------|------|
| Freshwater barracuda | Peixe-cachorro                                       | <i>Rhaphiodon vulpinus</i> ,<br><i>Acestrorhynchus falcirostris</i> ,<br><i>Acestrorhynchus falcatus</i> ,<br><i>Acestrorhynchus microlepis</i> | 1.9% |
| Marbled catfish      | Jandiá                                               | <i>Leiarius marmoratus</i>                                                                                                                      | 1.9% |
| Pacu                 | Pacu-comum,<br>jumento, marreca,<br>olhudo           | <i>Mylossoma</i> spp., <i>Myleus</i> spp.,<br><i>Metynnis</i> spp., <i>Myloplus</i> spp.                                                        | 1.6% |
| Peacock bass         | Tucunaré, açú,<br>pinima, tatú                       | <i>Cichla temensis</i> , <i>Cichla monoculus</i>                                                                                                | 1.0% |
| Earth eaters         | Cará-açú, acará<br>rosado, acará roxo,<br>acaratinga | <i>Astronotus</i> spp., <i>Caquetaia<br/>spectabilis</i> , <i>Geophagus proximus</i>                                                            | 1.0% |
| Piracatinga          | Piracatinga                                          | <i>Calophysus macropterus</i>                                                                                                                   | 0.9% |
| Pellona              | apapá amarelo,<br>apapá branco                       | <i>Pellona flavipinnis</i> , <i>Pellona<br/>castelnaeana</i>                                                                                    | 0.7% |
| Matrinxã             | matrinxã, jatuarana                                  | <i>Brycon cephalus</i>                                                                                                                          | 0.7% |
| Ripsaw catfish       | Cujuba                                               | <i>Oxydoras niger</i>                                                                                                                           | 0.7% |
| Slobbering catfish   | Barbado                                              | <i>Brachyplatystoma platynemum</i>                                                                                                              | 0.7% |
| Stingray             | Arraia                                               | <i>Potamotrygon</i> spp.                                                                                                                        | 0.6% |
| Pirapitinga          | Pirapitinga                                          | <i>Piaractus brachipomus</i>                                                                                                                    | 0.5% |
| Bacu                 | Bacu liso, pedra                                     | <i>Pterodoras lentiginosus</i> , <i>Lithodoras<br/>dorsalis</i>                                                                                 | 0.5% |
| Silver arowana       | Aruanã                                               | <i>Osteoglossum bicirrhosum</i>                                                                                                                 | 0.4% |
| Halftooth            | Charuto                                              | <i>Hemiodus</i> spp.                                                                                                                            | 0.4% |
| Redtail catfish      | Pirarara                                             | <i>Phractocephalus hemiliopterus</i>                                                                                                            | 0.4% |

| English name             | Local names                               | Scientific name                                                                                  | %             |
|--------------------------|-------------------------------------------|--------------------------------------------------------------------------------------------------|---------------|
| Piranha                  | Piranha cajú,<br>mafurá, preta            | <i>Serrasalmus</i> spp.                                                                          | 0.4%          |
| Jaú                      | Jaú                                       | <i>Zungaro zungaro</i>                                                                           | 0.3%          |
| Toothless<br>characin    | branquinha comum,<br>cascuda, cabeça lisa | <i>Potamorhina latior</i> , <i>Psectrogaster<br/>amazonica</i> , <i>Potamorhina altamazonica</i> | 0.2%          |
| Flatwhiskered<br>catfish | Piranambu                                 | <i>Pinirampus pirinampu</i>                                                                      | 0.1%          |
| Pirarucu                 | Pirarucu                                  | <i>Arapaima gigas</i>                                                                            | 0.1%          |
| Mandí                    | Mandí                                     | <i>Pimelodus</i> spp.                                                                            | 0.1%          |
| Atipa                    | Tamuatá                                   | <i>Hoplosternum littorale</i>                                                                    | 0.1%          |
| Sardine                  | sardinha comprida,<br>sardinha papuda     | <i>Triportheus</i> spp.                                                                          | 0.0%          |
| Wolf fish                | Traíra                                    | <i>Hoplias malabaricus</i>                                                                       | 0.0%          |
| Striped catfish          | Cara de gato                              | <i>Platynemateichthys notatus</i>                                                                | 0.0%          |
| Dogtooth<br>characin     | Saranha                                   | <i>Cynodon gibbus</i>                                                                            | 0.0%          |
| Jeju                     | Jeju                                      | <i>Hoplerythrinus unitaeniatus</i>                                                               | 0.0%          |
| Electric eel             | Puraqué                                   | <i>Electrophorus electricus</i>                                                                  | 0.0%          |
| <b>Total</b>             |                                           |                                                                                                  | <b>100.0%</b> |
